# Supplementary material for: Carbon quantum dot synthesis of a Ag/PCQD composite for the visual detection of Hg2+ in dH2O solution and seawater samples
Source: Royal Society of Chemistry journal article supplement (doi:10.1039/d2nj04379c), 2022-01-01
Supplement: d2nj04379c1.pdf [file d2nj04379c1.pdf]

## New Journal of Chemistry

### Supporting Information for

#### Carbon quantum dots synthesis of Ag/PCQDs composite for Hg<sup>2+</sup> visual detection in dH<sub>2</sub>O solution and seawater samples

Lin-Li Wu<sup>a</sup>, Xiao-Hong Li<sup>a\*</sup>, Ying Liu<sup>b</sup>, Yan-Li Leng<sup>a</sup>, Yang Li<sup>a</sup>, Xiao-Hua Cai<sup>a\*</sup>

### Material and methods

#### Chemicals/reagents

palm mane (from Guiyang, Guizhou), AgClO<sub>4</sub>·H<sub>2</sub>O, Hg(ClO<sub>4</sub>)<sub>2</sub>·H<sub>2</sub>O, Hg(NO<sub>3</sub>)<sub>2</sub>·2H<sub>2</sub>O, HgCl<sub>2</sub>, Hg(OAc)<sub>2</sub>·H<sub>2</sub>O, CH<sub>3</sub>HgCl, Al(ClO<sub>4</sub>)<sub>3</sub>·9H<sub>2</sub>O, Ca(ClO<sub>4</sub>)<sub>2</sub>·4H<sub>2</sub>O, Cd(ClO<sub>4</sub>)<sub>2</sub>·4H<sub>2</sub>O, Co(ClO<sub>4</sub>)<sub>2</sub>·6H<sub>2</sub>O, Cu(ClO<sub>4</sub>)<sub>2</sub>·6H<sub>2</sub>O, Mg(ClO<sub>4</sub>)<sub>2</sub>·6H<sub>2</sub>O, Mn(ClO<sub>4</sub>)<sub>2</sub>·4H<sub>2</sub>O, Fe(ClO<sub>4</sub>)<sub>3</sub>·9H<sub>2</sub>O, Ni(ClO<sub>4</sub>)<sub>2</sub>·6H<sub>2</sub>O, Pb(ClO<sub>4</sub>)<sub>2</sub>·3H<sub>2</sub>O, Zn(ClO<sub>4</sub>)<sub>2</sub>·6H<sub>2</sub>O, BaCl<sub>2</sub>·2H<sub>2</sub>O, Cr(NO<sub>3</sub>)<sub>3</sub>·9H<sub>2</sub>O, FeCl<sub>2</sub>, Ga(NO<sub>3</sub>)<sub>3</sub>·xH<sub>2</sub>O, GdCl<sub>3</sub>·6(H<sub>2</sub>O), RuCl<sub>3</sub>·H<sub>2</sub>O, CH<sub>3</sub>COONa, NaCl, NaF, Na<sub>2</sub>CO<sub>3</sub>, Na<sub>3</sub>PO<sub>4</sub>·12H<sub>2</sub>O, ethyl piperazine ethanesulfonic acid (HEPES) and Na<sub>2</sub>SO<sub>4</sub> were of analytical reagent grade and were purchased from SIGMA-ALDRICH. Certified reference material (CRM) of coastal seawater Hg<sup>2+</sup> was purchased from LGC Standards (UK). Hg<sup>2+</sup> in the following experiments was all based on Hg(ClO<sub>4</sub>)<sub>2</sub>. The tap water comes from the girls' dormitory of our university without any pretreatment. The river water obtained from Nanming River from Fenghuang Bay. Coastal seawater Hg<sup>2+</sup> certified reference material (CRM) was purchased from LGC Standards (UK).

#### Characterization of PCQDs, Ag/PCQDs composite and AgHg amalgam

The crystal structure and surface morphology of the PCQDs, Ag/PCQDs, AgHg

<sup>a</sup> School of Chemical Engineering, Guizhou Minzu University, Guizhou, Guiyang 550025, P. R. China.

<sup>b</sup> School of Chemical Engineering, Guizhou Institute of Technology, Guiyang 550003, P. R. China.

Corresponding author: lixiaohong668@163.com (X. H. Li).

Co-Corresponding author: caixh1111@163.com (X. H. Cai).

amalgam were measured by a transmission electron microscope JEM-F200 (TEM, JEOL, Tokyo, Japan) with an accelerating voltage of 200 kV. The XPS data were collected with an X-ray photoelectron spectrometer (Thermo Scientific K-Alpha+, ThermoFisher, USA) with a mono Al-K $\alpha$  excitation source (1486.6eV). The UV-Vis absorption spectra of the PCQDs, Ag/PCQDs, AgHg amalgam were achieved via a UV-Vis spectrometer (Shimadzu, Kyoto, Japan) over the wavelength range from 250 nm to 700 nm (1 nm interval). The fluorescence spectrum of the sample was recorded using a fluorescence spectrophotometer (F-320 Gangdong, Tianjin). The DLS size distribution and zeta potential were collected with a nanometer particle size and Zeta potential analyzer (Malvern Zetasizer Nano ZS90). To prove the accuracy of the method, the concentration of Hg<sup>2+</sup> in real water samples, saline solution and Hg<sup>2+</sup> seawater CRM were determined by cold vapour atomic absorption spectrometry (CVAAS) using DMA-80 (Milestone, Italy). Compared with the Ag/PCQDs composite method, the concentration of Hg<sup>2+</sup> in water samples was determined by CVAAS using DMA-80 (ThermoFisher, USA).

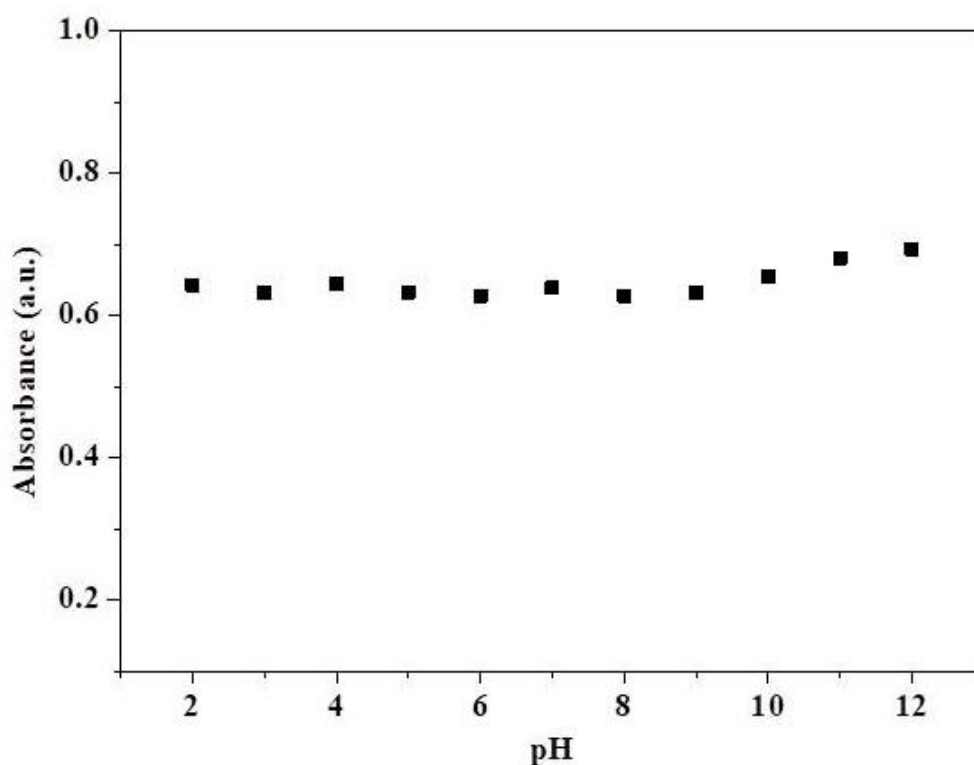

Figure 1S. Effect of pH value of Ag/PCQDs composite to Hg<sup>2+</sup> detection

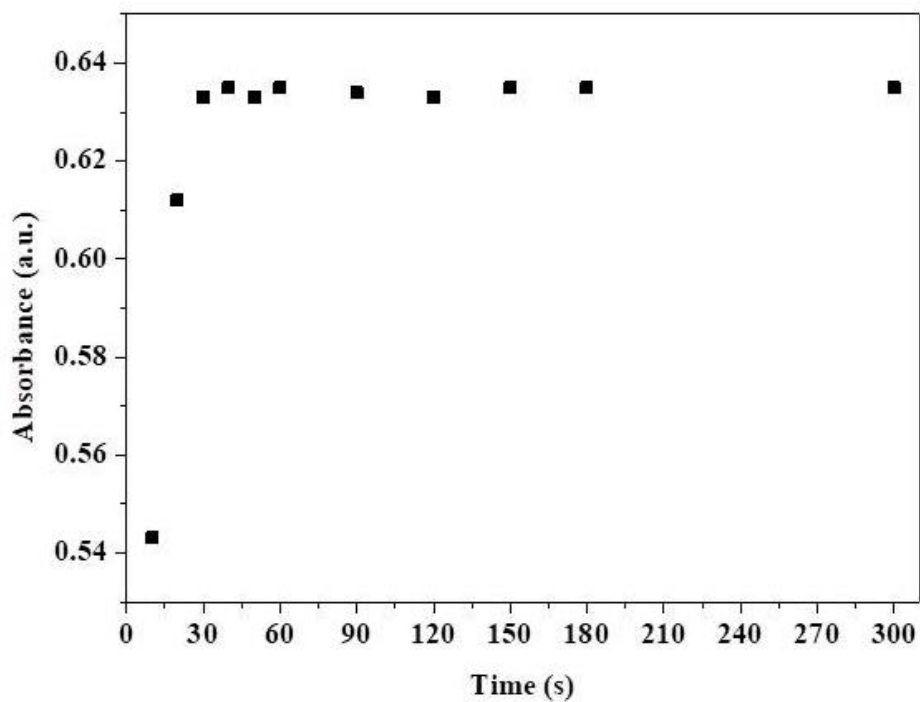

Figure 2S. Effect of time of Ag/PCQDs composite to  $\text{Hg}^{2+}$  detection

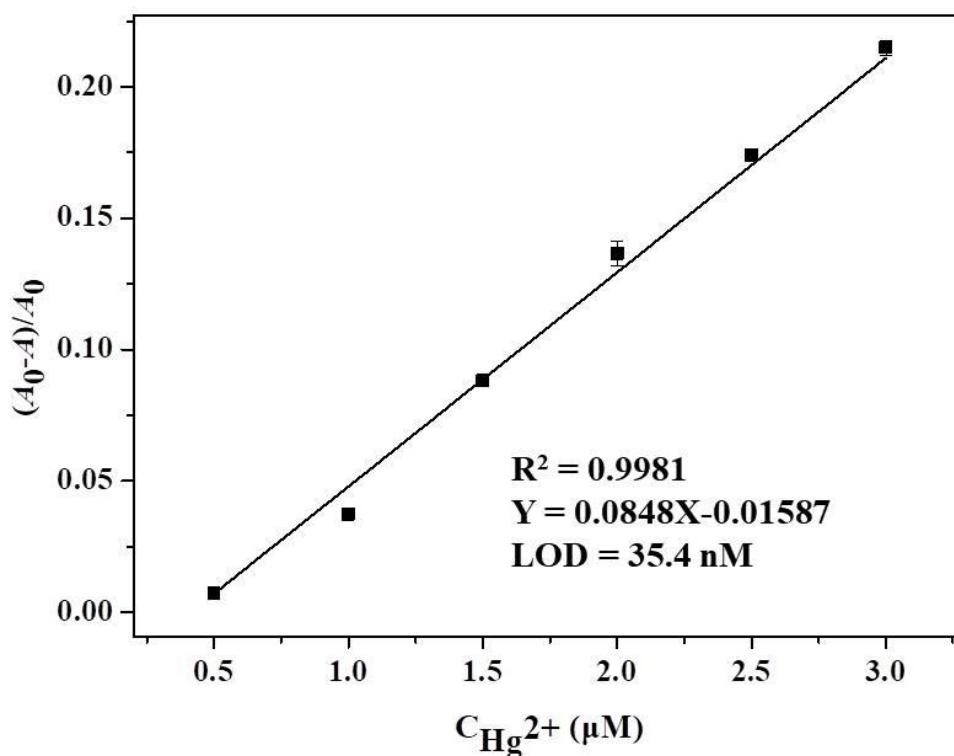

Figure 3S. Plot of the intensity for the relative absorption intensity  $(A_0 - A)/A_0$  over the concentration of  $\text{Hg}^{2+}$  in  $\text{dH}_2\text{O}$  solution ( $\lambda = 426 \text{ nm}$ ).

The result of the analysis as follows:

Equation:  $Y = A + B \times X$

$$Y = 0.0848 \times X - 0.01587$$

$$R = 0.9981$$

$$S = 0.0848 \times 10^6 \quad K = 3$$

$$\delta = \sqrt{\frac{\sum (A_0 - \bar{A}_0)^2}{N-1}} = 0.00102 \quad (N = 10)$$

$$LOD = \frac{3\delta}{slope}, \quad LOD = K \times \delta / S = 3.54 \times 10^{-8} \text{ M} = 35.4 \text{ nM}$$

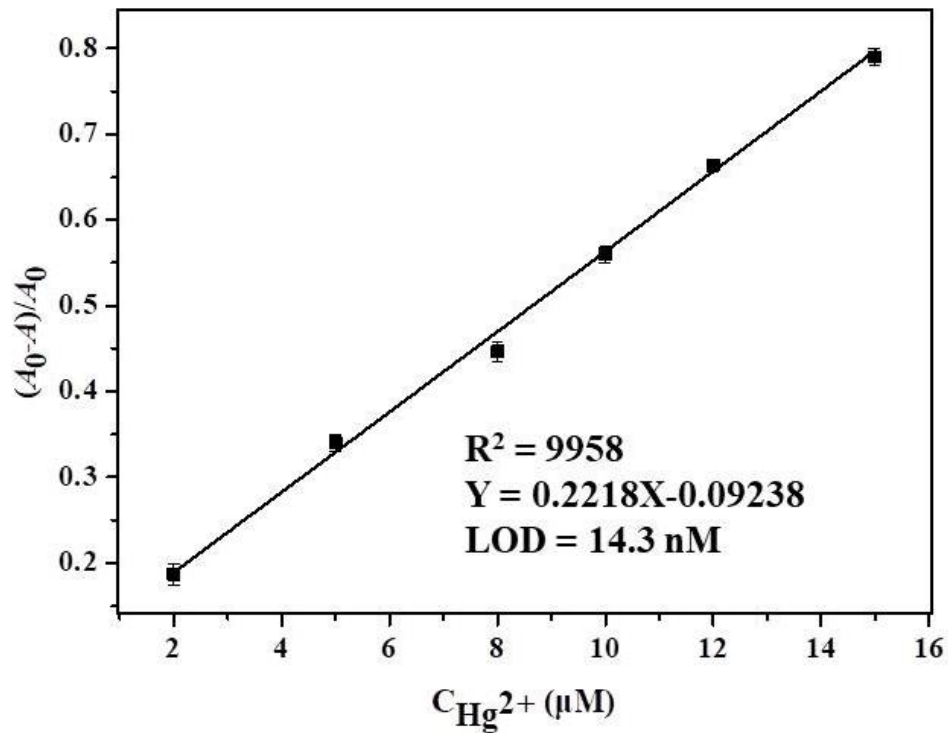

Figure 4S. Plot of the intensity for the relative absorption intensity  $(A_0 - A)/A_0$  over the concentration of  $Hg^{2+}$  in 0.6 M NaCl solutions ( $\lambda = 426 \text{ nm}$ ).

The result of the analysis as follows:

Equation:  $Y = A + B \times X$

$$Y = 0.2218 \times X - 0.09238$$

$$R = 0.9958$$

$$S = 0.2218 \times 10^6 \quad K = 3$$

$$\delta = \sqrt{\frac{\sum (A_0 - \bar{A}_0)^2}{N-1}} = 0.00106 \text{ (N = 10)}$$

$$LOD = \frac{3\delta}{slope}, \text{ LOD} = K \times \delta / S = 14.3 \times 10^{-8} \text{ M} = 14.3 \text{ nM}$$

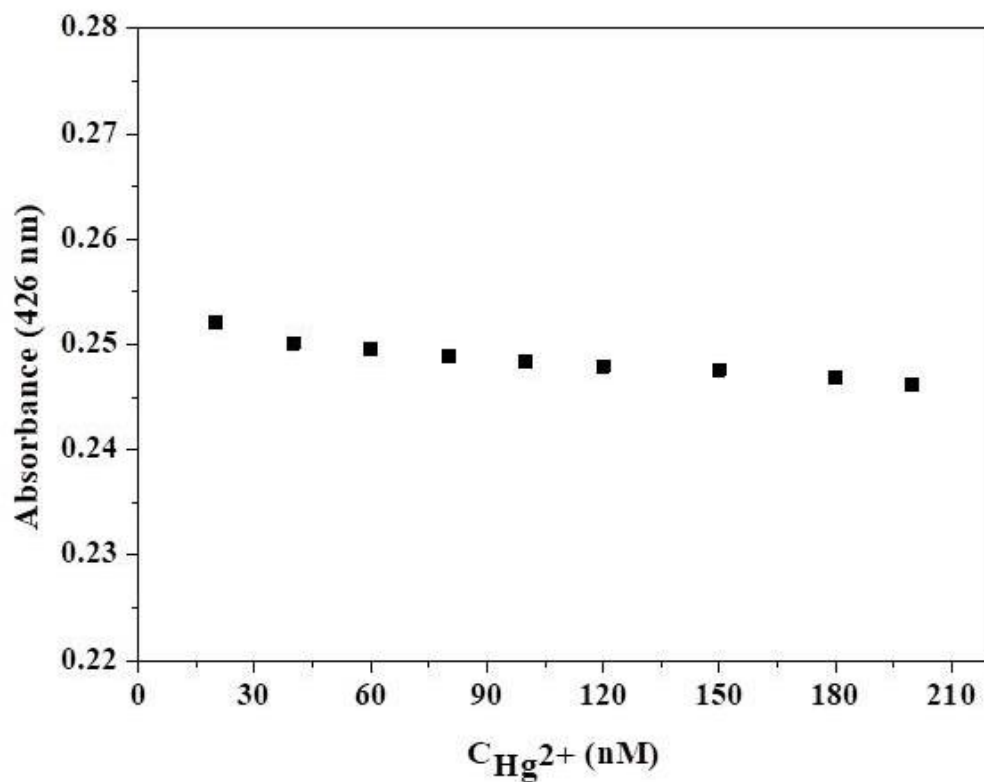

Figure 5S. UV-vis absorption values of Ag/PCQDs composite upon different concentrations of  $\text{Hg}^{2+}$  in the range of 20-200 nM.

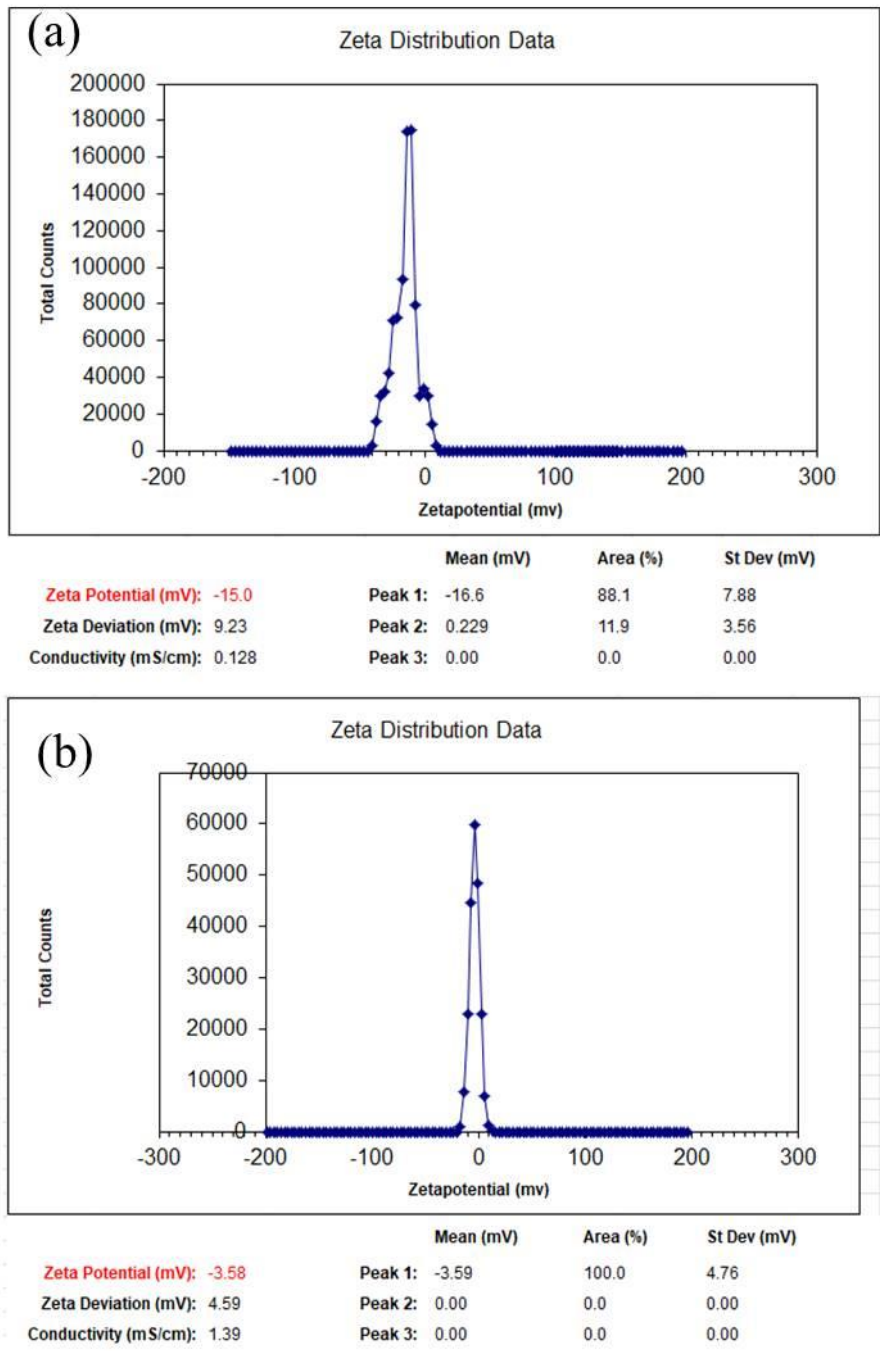

Figure 6S. (a) The Zeta potential distribution data of Ag/PCQDs composite (b) Ag/PCQDs composite after addition of  $Hg^{2+}$

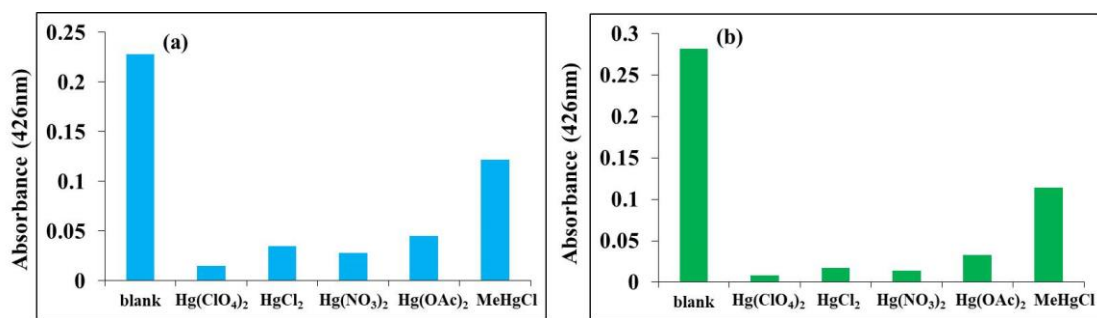

Figure 7S. The Ag/CQDs upon different mercury sources (50  $\mu$ M) (a) in dH<sub>2</sub>O solution (b) in seawater samples
